# Supplementary material for: The effect of oxidant species on direct, non-syngas conversion of methane to methanol over an FePO4 catalyst material
Source: Royal Society of Chemistry journal article supplement (doi:10.1039/c9ra02327e), 2019-01-01
Supplement: c9ra02327e1.pdf [file c9ra02327e1.pdf]

### Electronic Supplementary Information

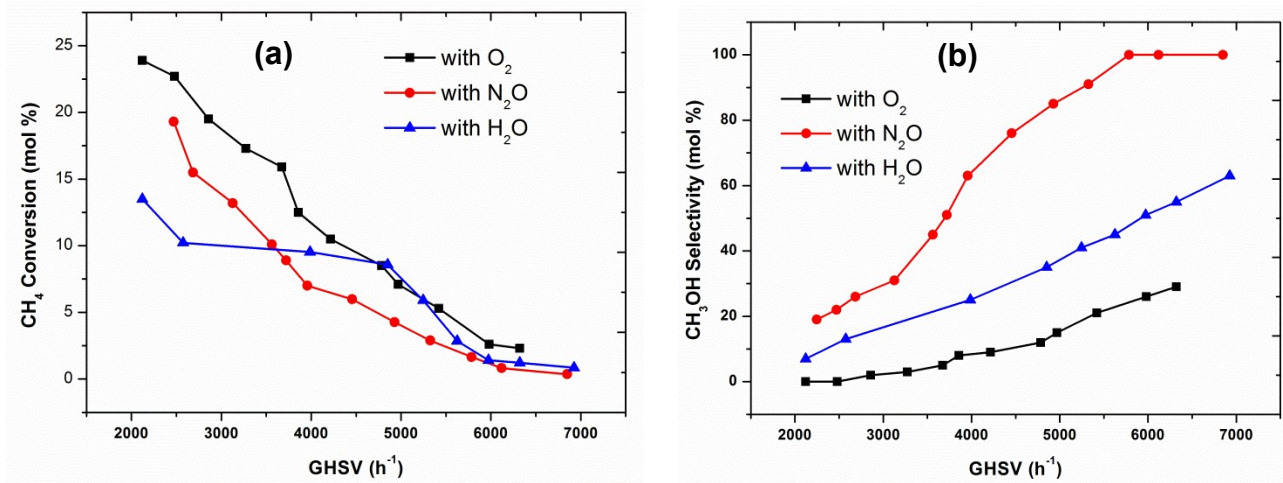

**Figure S1:** Influence of flow rate on (a) methane conversion and (b) methanol selectivity in partial oxidation of methane over FePO<sub>4</sub> catalyst (GHSV = 2000-7000 h<sup>-1</sup>, temperature = 300 °C and at methane to oxidant ratio of 1:1)

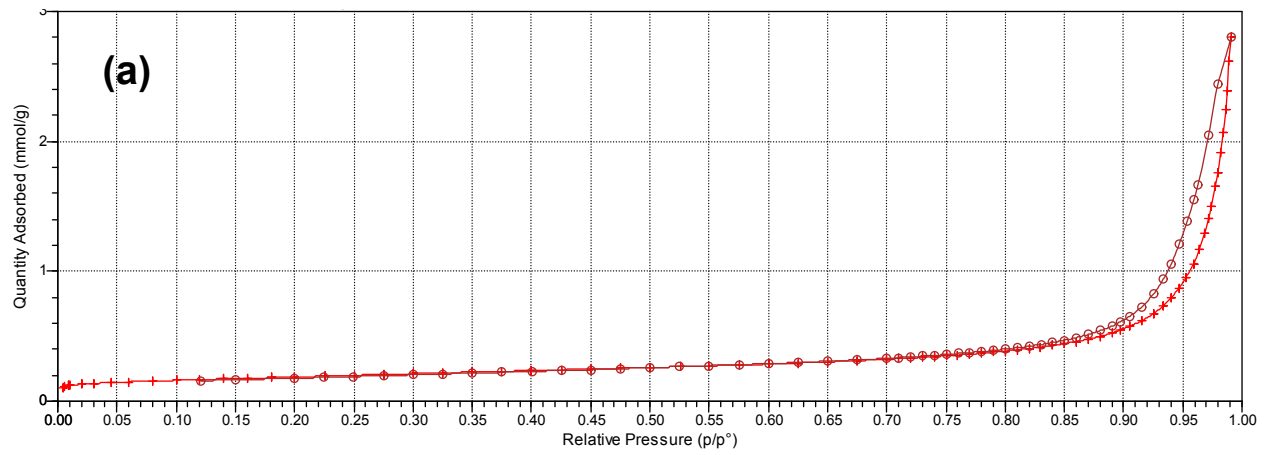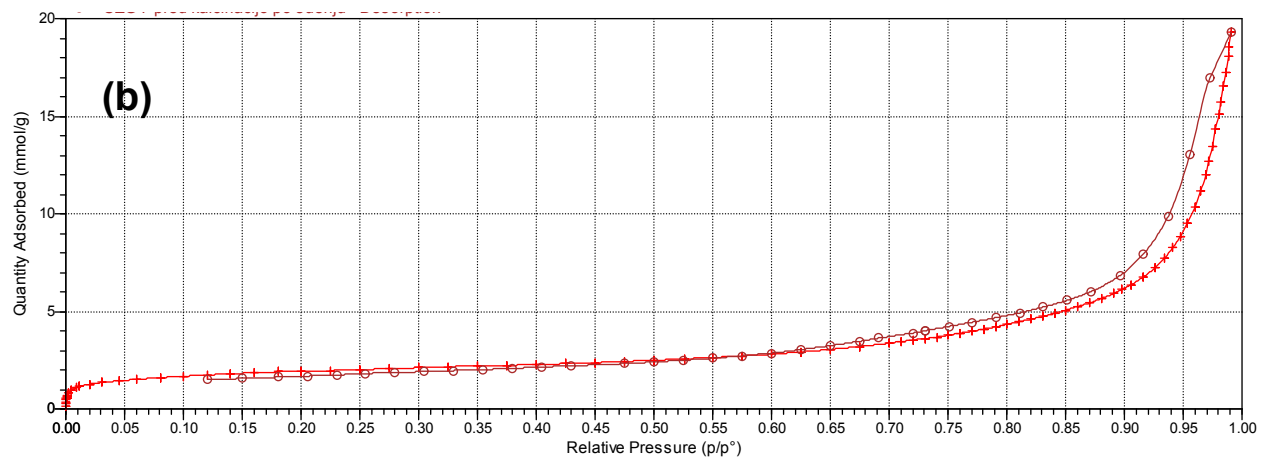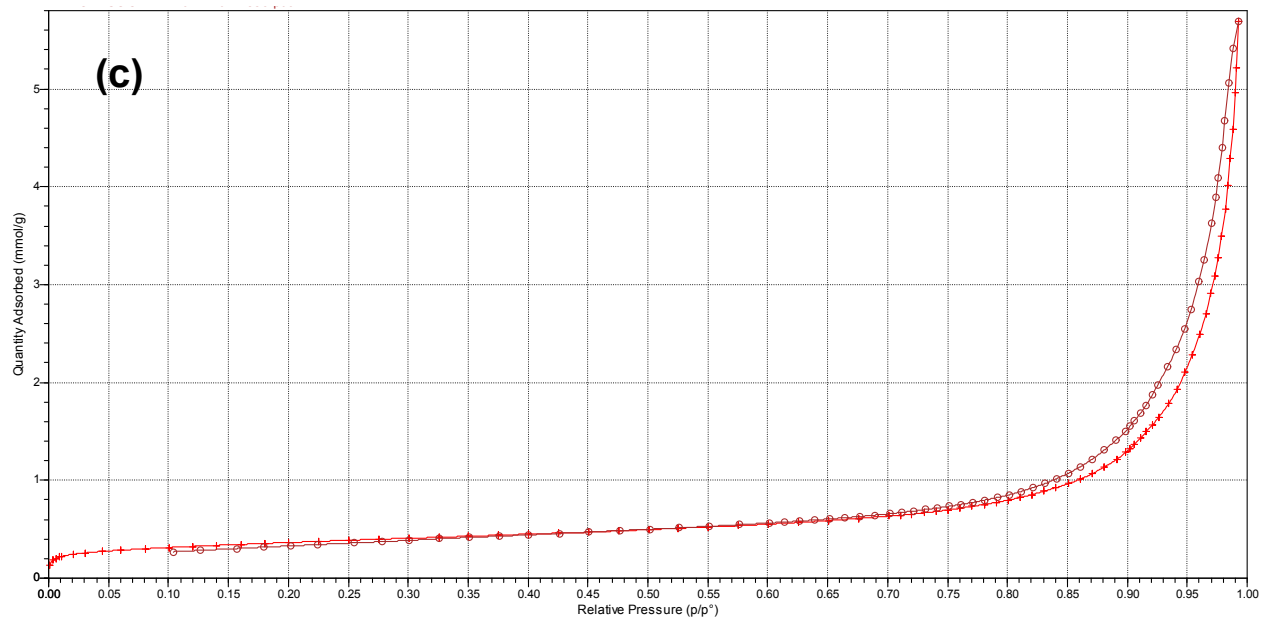

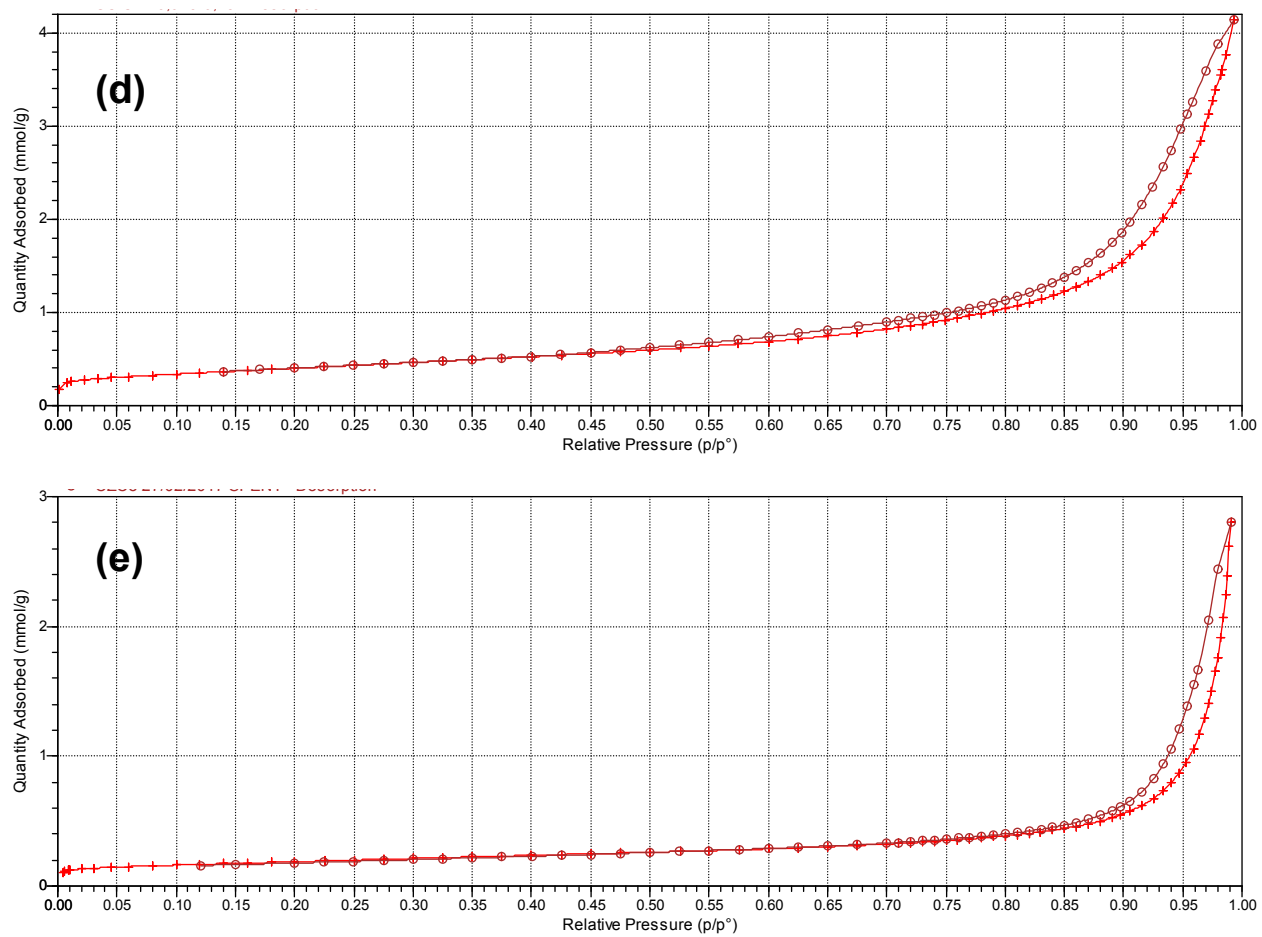

**Figure S2:** N<sub>2</sub> physisorption isotherms of FePO<sub>4</sub> catalyst. (a) fresh, (b) reduced (with CH<sub>4</sub>) and oxidised with (c) N<sub>2</sub>O, (d) O<sub>2</sub> and (e) H<sub>2</sub>O.

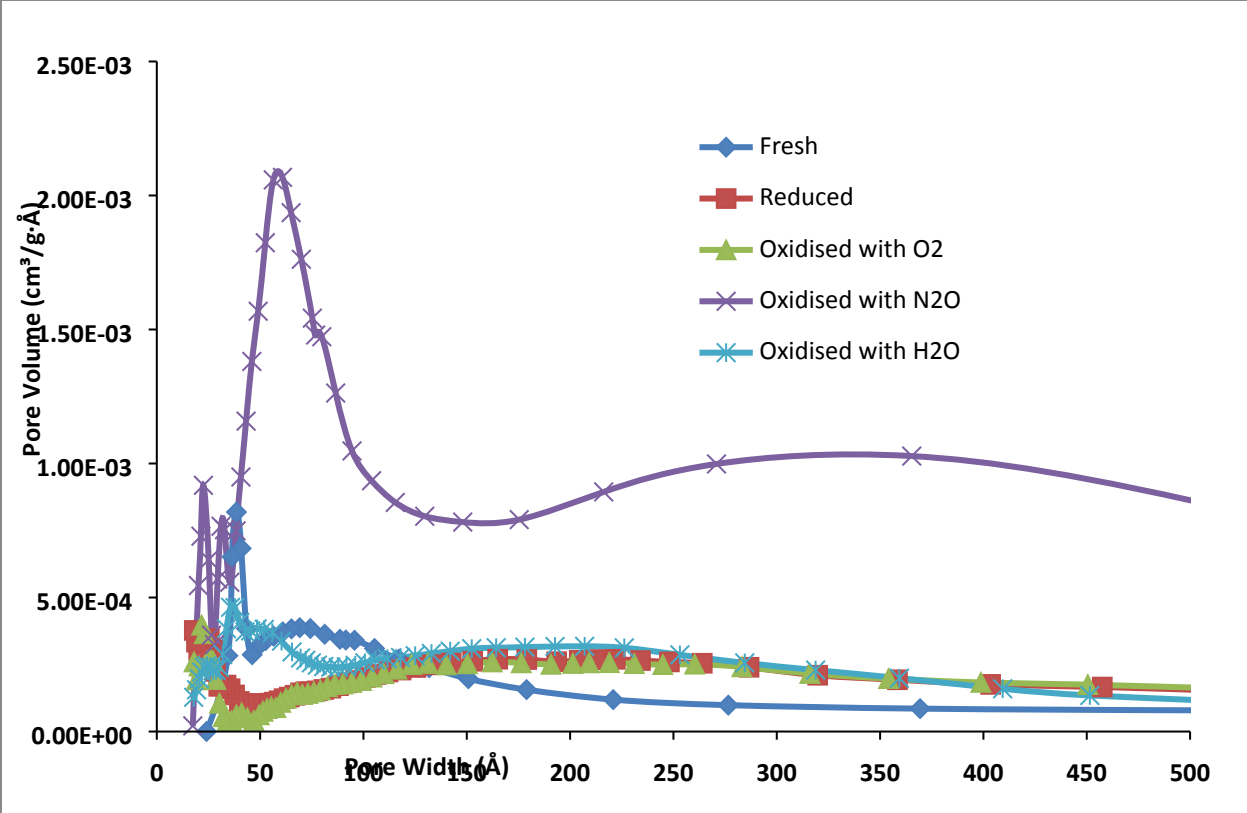

Figure S3: Pore size distribution plot of FePO<sub>4</sub> catalyst

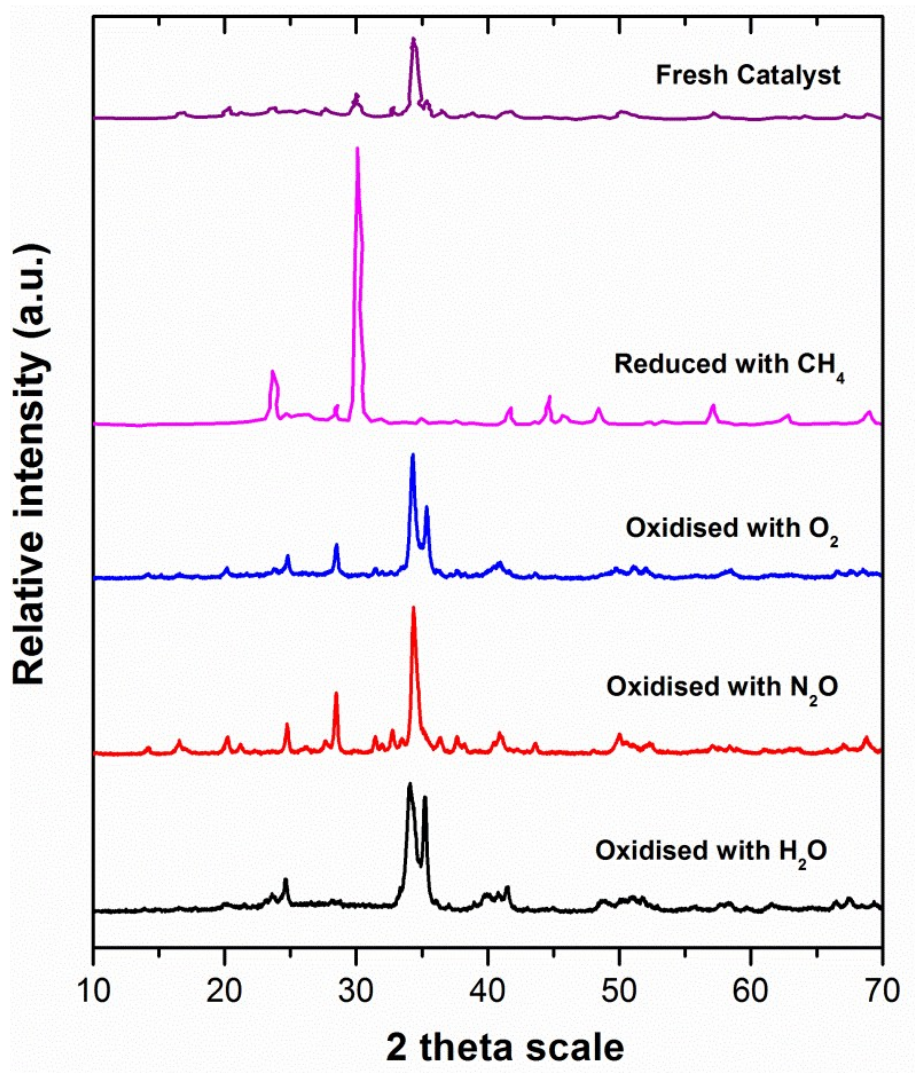

**Figure S4:** Powder X-ray diffraction of FePO<sub>4</sub> catalyst under various treatments [37] (Reprinted with permission from Springer Link)

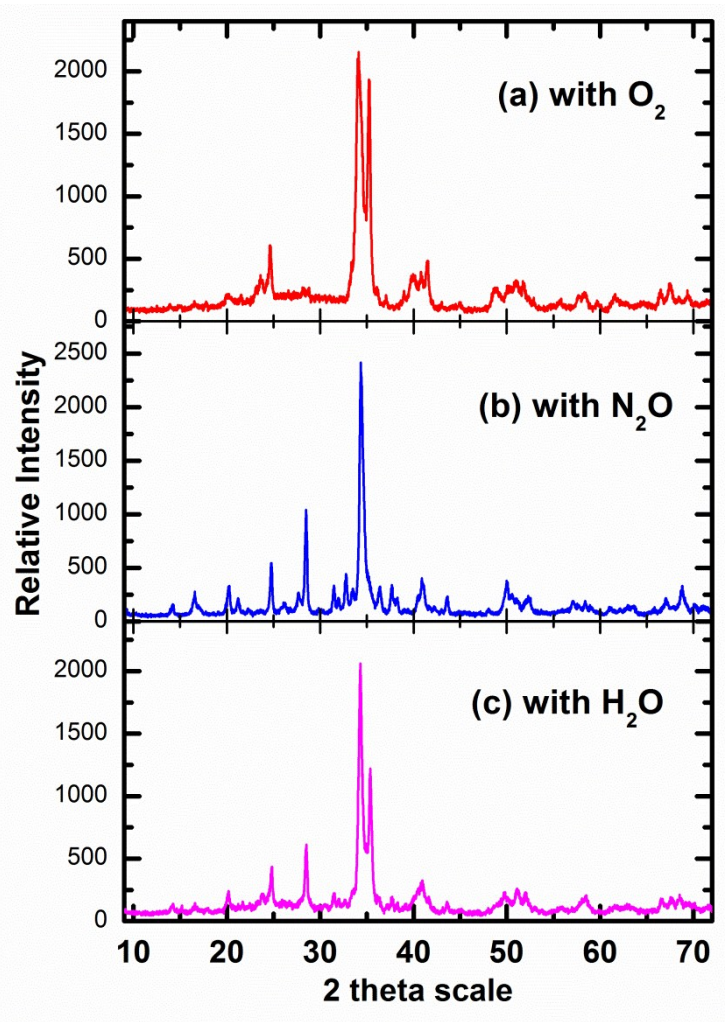

**Figure S5** : Powder X-ray diffraction patterns of the used catalysts after reaction with (a) O<sub>2</sub>, (b) N<sub>2</sub>O and (c) H<sub>2</sub>O.[37] (Reprinted with permission from Springer Link)
